## Oxygen-dependence of upper thermal limits in fishes

Rasmus Ern<sup>1</sup>, Tommy Norin<sup>2,†</sup>, A. Kurt Gamperl<sup>2</sup>, Andrew J. Esbaugh<sup>1</sup>

<sup>1</sup>The University of Texas at Austin, Marine Science Institute, USA.

<sup>2</sup>Department of Ocean Sciences, Memorial University of Newfoundland, St. John's, NL, Canada.

<sup>†</sup>Current affiliation: Institute of Biodiversity, Animal Health & Comparative Medicine, University of Glasgow, Graham Kerr Building, Glasgow, United Kingdom.

### Corresponding author

Rasmus Ern

Email: [rasmus@ern.dk](mailto:rasmus@ern.dk)

### Key Words

Aerobic scope, Critical oxygen tension ( $P_{crit}$ ), Critical thermal maximum ( $CT_{max}$ ), Hypoxia, Oxygen limit for thermal tolerance ( $P_{CT_{max}}$ ), Temperature.

### Summary statement

Based on measurements of critical thermal maximum temperatures in marine fishes under hypoxia, this study provides a novel metric ( $P_{CT_{max}}$ ) for assessing the oxygen sensitivity of upper thermal limits in water-breathing ectotherms.

## ABSTRACT

Temperature-induced limitations on the capacity of the cardiorespiratory system to transport oxygen from the environment to the tissues, manifested as a reduced aerobic scope (maximum minus standard metabolic rate), have been proposed as the principal determinant of the upper thermal limits of fishes and other water-breathing ectotherms. Consequently, the upper thermal niche boundaries of these animals are expected to be highly sensitive to aquatic hypoxia and other environmental stressors that constrain their cardiorespiratory performance. However, the generality of this dogma has recently been questioned, as some species have been shown to maintain aerobic scope at thermal extremes. Here, we experimentally tested whether reduced oxygen availability due to aquatic hypoxia would decrease the upper thermal limits (*i.e.*, the critical thermal maximum;  $CT_{max}$ ) of the estuarine red drum (*Sciaenops ocellatus*) and the marine lumpfish (*Cyclopterus lumpus*). In both species,  $CT_{max}$  was independent of oxygen availability over a wide range of oxygen levels despite substantial reductions in aerobic scope (*i.e.*, > 72%). These data show that the upper thermal limits of water-breathing ectotherms are not always linked to the capacity for oxygen transport. Consequently, we propose a novel metric for classifying oxygen-dependence of thermal tolerance; the oxygen limit for thermal tolerance ( $P_{CT_{max}}$ ), which is the water oxygen tension ( $P_w O_2$ ) where an organism's  $CT_{max}$  starts to decline. We suggest that this metric can be used for assessing the oxygen sensitivity of upper thermal limits in water-breathing ectotherms, and the susceptibility of their upper thermal niche boundaries to environmental hypoxia.

## INTRODUCTION

Marine ectotherms largely occupy the extent of latitudes tolerable within their thermal limits (Sunday et al., 2012), and are therefore, expected to shift their latitudinal distribution ranges poleward with climate warming (Pörtner, 2014b; Sunday et al., 2012). The critical thermal maximum ( $CT_{max}$ ), typically determined as the temperature at which animals exhibit a loss of equilibrium (LOE) (Beitinger et al. 2000), defines the upper limit of a species' fundamental thermal niche and is the temperature where animal function ceases due to the collapse of one or more vital physiological functions (Pörtner, 2010).

Oxygen supply capacity refers to the maximum ability of the cardiorespiratory system to supply oxygen to the tissues by increasing ventilation, cardiac output, and blood oxygen carrying capacity. Over the last two decades, laboratory studies have reported reduced heart and ventilation rates, diminished cardiac output and blood oxygen content, and an accumulation of anaerobic metabolites in water-breathing ectotherms exposed to acute temperature increases that approach their upper thermal limits (Frederich and Pörtner, 2000; Mark et al., 2002; Melzner et al., 2006; Wittmann et al., 2008). This led to the hypothesis that fishes and other water-breathing ectotherms, at temperatures approaching their  $CT_{max}$ , are unable to maintain sufficient oxygen supply for basic metabolism due to temperature-induced cardiorespiratory constraints. The temperature where animals become reliant on unsustainable anaerobic metabolism for vital physiological functions is termed the critical temperature ( $T_{crit}$ ) (Farrell et al., 2009; Pörtner, 2010). Above  $T_{crit}$ , extreme hypoxemia develops and the time until terminal ATP-deficiency (*i.e.*,  $CT_{max}$ ) becomes progressively shorter with increased warming (Pörtner, 2010). In species where the upper thermal limits are determined by insufficient oxygen supply for vital physiological functions, any reduction in oxygen availability should reduce both  $T_{crit}$  and  $CT_{max}$ . The upper thermal limits of these species can, thus, be described as oxygen-dependent.

In fishes, reduced cardiorespiratory performance and oxygen supply capacity at supra-optimal temperatures have been correlated with reductions in population abundance (Johansen et al., 2015; Pörtner and Knust, 2007) and migration performance (Eliason et al., 2011). It has also been suggested that oxygen-dependent upper thermal limits identified in the laboratory represent those in the field (Giomi et al., 2014; Pörtner and Knust, 2007). However, the link between oxygen supply capacity and upper thermal limits has recently been questioned, as other studies have reported that aerobic scope (AS; the difference between the maximum metabolic rate, MMR, and

the standard metabolic rate, SMR) and cardiorespiratory performance are maintained in a number of fish and crustacean species experiencing ecologically-relevant thermal extremes (Brijs et al., 2015; Clark et al., 2013a; Ern et al., 2015; Ern et al., 2014; Grans et al., 2014; Healy and Schulte, 2012; Jost et al., 2012; Norin et al., 2014). It has, therefore, been suggested that some species possess a more thermally resistant cardiorespiratory system (Ern et al., 2014; Jost et al., 2012), and that insufficient tissue oxygen supply is not the primary determinant of upper thermal limits in all water-breathing ectotherms (Brijs et al., 2015; Wang et al., 2014).

Thermal tolerance can be described as the capacity to maintain the performance of a single physiological function (*e.g.*, heart rate) or a group of related functions (*e.g.*, cardiorespiratory oxygen transport) when temperatures change. Whereas, thermal limits describe the temperatures where the performance of such functions begins to decline, or is reduced to zero.  $CT_{max}$  is a widely used metric for evaluating the thermal tolerance and thermal limits of animals (Terblanche et al., 2011 and references within), but involves an acute increase in temperature, representative of relatively few aquatic environments (*e.g.*, shallow tropical estuaries, tide pools, desert streams). Furthermore, because the performance capacity of physiological functions are influenced by both the rate of temperature change and the duration of exposure to new temperatures, the ecological relevance of such measurements must take into account these two parameters (*e.g.*, Somero, 2010; Terblanche et al. 2011; Farrell, 2016); especially if the rates of change greatly exceed those encountered by the species in the wild. Nonetheless,  $CT_{max}$  and an organism's thermal breadth ( $CT_{max} - CT_{min}$ ) have been applied widely in both experimental studies and meta-analyses on the impacts of climate warming on aquatic ectotherms, including in predictions of their global (re)distribution (*e.g.*, Sunday et al., 2011; Sunday et al., 2012; Magozzi and Calosi, 2015; Vinagre et al., 2016). Investigating the oxygen-dependence of thermal tolerance using  $CT_{max}$  is, therefore, highly relevant for continued research efforts aimed at understanding how climate change will impact ecological physiology and species' distributions. This is especially true as accelerated climate change not only involves increasing (and more extreme) temperatures, but also an increase in the frequency and severity of aquatic hypoxia (Altieri and Gedan, 2015; Diaz and Rosenberg, 2008). This latter condition is likely to play a key role in shaping the distribution of species if their upper thermal limits are oxygen-dependent.

From a physiological perspective, aquatic hypoxia can be defined as any water oxygen tension ( $P_w O_2$ ) that reduces MMR and AS, with the critical oxygen tension ( $P_{crit}$ ) characterised as the

$P_wO_2$  where AS is zero and any further reductions in  $P_wO_2$  result in a proportional decrease in the rate of oxygen consumption below that required to sustain baseline metabolism (*i.e.*, SMR) (Farrell and Richards, 2009). Thus, in species with oxygen-dependent upper thermal limits, the  $T_{crit}$  should be reduced at any level of hypoxia that causes a significant reduction in MMR and, thus, AS (Fig. 1A, B). Because upper thermal limits of these species are caused by terminal ATP-deficiency,  $CT_{max}$  should also decline accordingly. However, in species where the upper thermal limits in normoxia are not determined by insufficient oxygen supply, a portion of AS would remain at  $CT_{max}$  in normoxia (Fig. 1C) and no change in  $CT_{max}$  would be expected upon exposure to progressive hypoxia until the  $P_wO_2$  where MMR is reduced down to SMR, and AS reaches zero (Fig. 1D). In such a case, the upper thermal limits in normoxia can be described as oxygen-independent.

To investigate whether acute upper thermal tolerance (*i.e.*,  $CT_{max}$ ) in fishes is determined by insufficient oxygen supply capacity, we actively constrained AS by lowering water oxygen availability (*i.e.*, induced hypoxia), and then measured  $CT_{max}$  at a wide range of water oxygen tensions ( $P_wO_2$ ), from normoxia to severe hypoxia. This allowed us to investigate if, or when, the fish's upper thermal limit (*i.e.*,  $CT_{max}$ ) became oxygen-dependent. We used two fish species with different thermal niches and ecologies; the athletic, free-swimming, eurythermal red drum (*Sciaenops ocellatus*; approximate natural temperature range, 15-26°C) and the more sluggish, cold-water lumpfish (*Cyclopterus lumpus*; approximate natural temperature range, 3-11°C) (Aquamaps.org, 2015).

## MATERIALS AND METHODS

### Animals and maintenance

Red drum (*Sciaenops ocellatus*) were reared at 22±1°C (salinity 35±1 ppt) at the University of Texas at Austin, Marine Science Institute (Port Aransas, Texas, USA), whereas lumpfish (*Cyclopterus lumpus*) were reared at 10±1°C (salinity 32±1 ppt) at the Ocean Sciences Centre, Memorial University of Newfoundland (St. John's, Newfoundland, Canada). Both species were fed with pelleted food every day, but were fasted for 24 h prior to experiments to avoid the metabolic effects of digestion on respirometry measurements. Individual fish were used only once in the experiments described below (*i.e.*, no fish were tested more than once).

Experimental procedures were performed in accordance with policies of the Institutional Animal Care and Use Committee of the University of Texas at Austin (red drum) and the Animal Care Committee of Memorial University of Newfoundland (lumpfish; protocol no. 15-88-KG). Studies on lumpfish also followed the guidelines of the Canadian Council on Animal Care.

### Respirometry

Metabolic rates were estimated from rates of oxygen consumption ( $\dot{M}_{O_2}$ ) as measured using fiberoptic oxygen sensors, meters and software (Pyro Science GmbH, Aachen, Germany or Loligo Systems, Tjele, Denmark), and intermittent-flow respirometry (Clark et al., 2013a; Steffensen, 1989).  $\dot{M}_{O_2}$  was calculated according to:

$$\dot{M}_{O_2} = \frac{-\delta[O_2] \times (V_{chamber} - V_f)}{BM},$$

where  $\dot{M}_{O_2}$  is oxygen consumption rate (mg O<sub>2</sub> h<sup>-1</sup> kg<sup>-1</sup>),  $\delta[O_2]$  is the slope of the decline in water oxygen concentration (mg L<sup>-1</sup> h<sup>-1</sup>) during the closed period of the intermittent respirometry cycle,  $V_{chamber}$  is the volume of the respirometer (L),  $V_f$  is the volume of the fish (*i.e.*, it was assumed that the fish had a density of 1 L kg<sup>-1</sup>), and BM is the fish's body mass in kg. Respirometry chamber volumes were 0.40 L for lumpfish and 1.20 L for red drum. Both the standard metabolic rate (SMR) and the maximum metabolic rate (MMR) of lumpfish and red drum were measured, and the aerobic scope (AS) of both species was calculated as MMR – SMR.

### Standard metabolic rate (SMR) and critical oxygen tension ( $P_{crit}$ )

SMR and  $P_{crit}$  were measured at 10 and 16°C for lumpfish and at 24 and 30°C for red drum ( $N = 8$  for each temperature and species). For each experimental group, the fish were placed inside respirometry chambers submerged in a tank with a flow-through supply of fully aerated seawater at 10°C for the lumpfish or 24°C for the red drum (the starting temperature for red drum was slightly higher than their acclimation temperature due to limited capacity for cooling in the experimental setup), and allowed 24 hours to settle inside the respirometry chambers. For the 10°C (lumpfish) and 24°C (red drum) groups,  $\dot{M}_{O_2}$  recordings were started immediately after the settling period. For the 16°C (lumpfish) and 30°C (red drum) groups, water temperature was gradually increased to these temperatures after the settling period, at a rate of 2°C h<sup>-1</sup>, upon which  $\dot{M}_{O_2}$  recordings were initiated.  $\dot{M}_{O_2}$  recordings were then continued for 12-17.5 h, which produced 95-100 (lumpfish) or 160-200 (red drum) individual  $\dot{M}_{O_2}$  measurements. For lumpfish the durations of each intermittent measurement cycle (flush/wait/measure) were (in seconds) 300/120/240 and 300/60/180 at 10 and 16°C, respectively, and for red drum were 90/30/120 and 120/30/120 at 24 and 30°C, respectively. Oxygen levels in the respirometry chambers did not fall below 90% air-saturation during  $\dot{M}_{O_2}$  measurements. SMR was determined by first taking the mean of the lowest 10% of  $\dot{M}_{O_2}$  measurements over the 12-17.5 h respirometry period, excluding outliers that were  $\pm 2$  s.d. from the mean (no more than two data points were identified as outliers for any fish), and finally calculating the mean of the remaining  $\dot{M}_{O_2}$  measurements (Clark et al., 2013a). This method ensured that only  $\dot{M}_{O_2}$  measurements recorded when the fish were quiescent were included in the SMR calculations.

$P_{crit}$  measurements were made immediately following the determination of SMR, by turning off the flush pumps and allowing the fish to consume the oxygen in the sealed respirometry chambers, thereby gradually exposing them to increasing hypoxia. At a  $P_wO_2$  of ~15 mmHg the flush pumps were turned back on and the fish were returned to a recovery tank. The obtained  $\dot{M}_{O_2}$  measurements were then plotted against the declining  $P_wO_2$ , and  $P_{crit}$  was calculated as the  $P_wO_2$  where  $\dot{M}_{O_2}$  first decreased below SMR. It should be noted that the  $\dot{M}_{O_2}$  of the fish during the  $P_{crit}$  experiment was often elevated above SMR, due to spontaneous movements under hypoxia, and is therefore, designated as routine metabolic rate (RMR) (see Fig. 2).

To account for background microbial respiration,  $\dot{M}_{O_2}$  recordings were also made after removal of the fish.  $\dot{M}_{O_2}$  from bacterial respiration was not detectable in any of these background measurements, likely due to the thorough cleaning of the respirometry equipment between measurements.

### **Maximum metabolic rate (MMR) and aerobic scope (AS)**

In separate experiments, MMR was measured at 10 and 16°C for lumpfish and 24 and 30°C for red drum ( $N = 8$  for each temperature and species) in both normoxia and in hypoxia ( $P_wO_2$  of 70–76 mmHg; Table 1). For all measurements, the fish were placed in a circular experimental tank (50 L) containing fully aerated seawater at 10°C (lumpfish) or 24°C (red drum) and left overnight. The following morning, water temperature was either maintained at 10°C or 24°C or heated to 16°C (lumpfish) or 30°C (red drum) at a rate of 2°C h<sup>-1</sup>. The fish were then individually exercised in normoxic water for 2 min (until exhaustion) by manual hand-chasing by the experimenter, and immediately transferred to a respirometry chamber kept at the appropriate temperature and  $P_wO_2$ .  $\dot{M}_{O_2}$  recordings commenced within 20 s after the cessation of chasing and MMR was determined over a 2-min period during the first  $\dot{M}_{O_2}$  recording, which was always the highest. The  $P_wO_2$  ( $\pm 2.5$  mmHg) in the tank containing the respirometry chambers was regulated using a solenoid system that bubbled air or nitrogen into the water.

To calculate the percentage change in AS with changing  $P_wO_2$ , a 3-parameter power function was fitted to MMR in normoxia and in hypoxia, SMR at  $P_{crit}$  and RMR below  $P_{crit}$ . The reductions in AS (from 0% in normoxia to 100% at  $P_{crit}$ ) were then calculated as the difference between the corresponding MMR on the regression line and SMR in normoxia (cf. Fig. 2A, B, D, E). Given that MMR was not measured at oxygen levels between ~50% and 100% air-saturation, the calculated change in AS with  $P_wO_2$  does not account for a potential ‘zone of hypoxia insensitivity’ near 100% air-saturation, where MMR may have been unaffected by mild reductions in dissolved oxygen. Consequently, the values of AS at high  $P_wO_2$  may be subject to a slight underestimate, which diminishes as  $P_wO_2$  approaches  $P_{crit}$ .



### Critical thermal maximum ( $CT_{max}$ ) and the oxygen limit for thermal tolerance ( $P_{CT_{max}}$ )

Finally, in both species,  $CT_{max}$ , was measured in normoxia and at multiple levels of hypoxia (see below;  $N = 8$  in all groups). For all measurements, the fish were placed inside respirometry chambers submerged in a 40 L tank containing fully aerated seawater at 10°C (lumpfish) or 24°C (red drum) and left overnight. The following morning,  $P_wO_2$  was either maintained at normoxia or acutely reduced to 100, 80, 67, 60, 40, or 21 mmHg (lumpfish) or 76, 47, 35, 23, or 11 mmHg (red drum) by bubbling the reservoir supplying water to the chambers with nitrogen. The reduction in  $P_wO_2$  took 5-30 min depending on the target  $P_wO_2$ , and this level ( $\pm 2.5$  mmHg) was maintained during the entire  $CT_{max}$  measurement by use of the solenoid system. Once the target  $P_wO_2$  was reached, the water temperature was elevated continuously at a rate of 2°C h<sup>-1</sup> until the fish exhibited loss of equilibrium (LOE). The temperature where LOE occurred was taken as  $CT_{max}$ . Due to the morphology of the lumpfish (flattened ventral surface), these fish did not necessarily fall over at the point of LOE, and were therefore, gently prodded with a cotton swab at regular intervals as  $CT_{max}$  was approached. The temperature where the fish no longer righted themselves after being gently prodded was taken as  $CT_{max}$  for this species. Once  $CT_{max}$  was reached for individual fish, they were removed from their chambers and returned to a recovery tank. No fish were used more than once.

Both  $P_{crit}$  and the hypoxia induced reduction in AS increased with temperature from 10 to 16°C (lumpfish) (Fig. 2A, B) and from 24 to 30°C (red drum) (Fig. 2D, E). Therefore, the percentage changes in AS at the  $P_wO_2$  levels where  $CT_{max}$  was measured (see Fig. 2C, F) were calculated, as described above, from the  $\dot{M}_{O_2}$  data at 16°C (lumpfish) or 30°C (red drum). Consequently, the calculated percentage changes in AS are minimal (conservative) estimates (*i.e.*,  $CT_{max}$  occurred at temperatures higher than those for which the changes in AS were calculated, meaning that AS would have been reduced even more at those temperatures).

$P_{CT_{max}}$  was determined from the  $CT_{max}$  data by fitting a piecewise, two-segmented linear regression through the  $CT_{max}$  values not significantly different from  $CT_{max}$  in normoxia, and the  $CT_{max}$  values significantly different from  $CT_{max}$  in normoxia (see Fig. 3).

### Statistical analyses

Student's t-tests were used to examine the effect of temperature on MMR, SMR, AS and  $P_{crit}$ , as well as the effect of hypoxia on MMR. All *P*-values were corrected for multiple comparisons using

false discovery rate (FDR) correction. FDR cutoff values were 0.0383 and 0.00802 for lumpfish and red drum, respectively. One-way analysis of variance was used to test the effect of  $P_wO_2$  on  $CT_{max}$ . All assumptions of these statistical tests were met. Statistical analyses were conducted using SigmaPlot (Systat Software, Inc., Chicago, IL, USA), and the significance level for all tests was  $P < 0.05$ .

## RESULTS

MMR decreased significantly in both lumpfish and red drum when exposed to hypoxia ( $P < 0.001$  for both species and temperatures), and as a result, AS fell with water oxygen tension ( $P_wO_2$ ), as expected, until the critical oxygen tension ( $P_{crit}$ ) where AS was zero (Fig. 2A, B, D, E). At the higher temperatures (16 vs. 10°C for lumpfish, 30 vs. 24°C for red drum), tolerance to hypoxia was reduced (*i.e.*,  $P_{crit}$  was significantly increased;  $P = 0.038$  for lumpfish and  $P = 0.008$  for red drum) and the hypoxia-induced decline in AS was more pronounced (Fig. 2B, E vs. Fig. 2A, D). However,  $CT_{max}$  did not show a gradual decrease with falling  $P_wO_2$  (Fig. 2C, F). For lumpfish,  $CT_{max}$  was maintained at 21.9–22.3°C down to a  $P_wO_2$  of 80 mmHg ( $P > 0.05$ ), at which point AS was reduced by at least 72% (Fig. 2A, B, C). At a  $P_wO_2$  of 67 mmHg, slightly above the  $P_{crit}$  at 16°C (63.8 mmHg),  $CT_{max}$  was significantly reduced to 20.9°C ( $P < 0.05$  compared to  $CT_{max}$  in normoxia), and this reduction continued with decreasing  $P_wO_2$  (Fig. 2C). For red drum, a similar pattern was observed, with no significant change in  $CT_{max}$  (36.1–36.5 °C) down to a  $P_wO_2$  of 47 mmHg ( $P > 0.05$ ), despite AS being reduced by at least 89% (Fig. 2D, E, F). In red drum, the first sign of reduced  $CT_{max}$  occurred at 35 mmHg ( $P < 0.05$  compared to  $CT_{max}$  in normoxia), slightly below the  $P_{crit}$  at 30°C (38 mmHg).

The oxygen limit for thermal tolerance ( $P_{CT_{max}}$ ), as calculated from the  $CT_{max}$  data, was 72.2 mmHg for lumpfish (Fig. 3A) and 35.8 mmHg for red drum (Fig. 3B). These values were significantly different ( $P < 0.001$ ).

All results, including fish body masses, are presented as means with associated standard errors in Table 1.

## DISCUSSION

This study tested the hypothesis that the upper thermal limits of fishes are determined by insufficient oxygen supply for vital physiological functions and, therefore, affected by oxygen availability. More specifically, we tested the assumption that the fish's critical thermal maximum ( $CT_{max}$ ) cannot be maintained under aquatic hypoxia where oxygen supply capacity (*i.e.*, AS) is reduced (cf. Fig. 1A, B). Contrary to this assumption, we found that the  $CT_{max}$  of both lumpfish and red drum was independent of oxygen availability over a wide range of water oxygen levels. In fact, the AS of lumpfish and red drum could be reduced by more than 72% and 89%, respectively, before  $CT_{max}$  was affected (Fig. 2). This shows that the upper thermal limits of water-breathing ectothermic animals are not always determined by oxygen supply capacity (cf. Fig. 1C, D).

In our experimental approach, we initially verified that MMR and AS were constrained in both lumpfish and red drum as water oxygen tension ( $P_wO_2$ ) was lowered at a constant temperature, both within (10°C for lumpfish, 24°C for red drum) and slightly above (16°C for lumpfish, 30°C for red drum) the species' typical temperature range (Fig. 2A, B, D, E). This was simply a proof of concept, as the constraining effect of hypoxia on AS is a well-known phenomenon in fishes (Claireaux and Chabot, 2016; Claireaux et al., 2000; Farrell and Richards, 2009; Fry, 1971; Lefrancois and Claireaux, 2003). We then defined  $CT_{max}$  at water oxygen levels ranging from air-saturation (normoxia) to below the fish's critical oxygen tension ( $P_{crit}$ ). In determining  $CT_{max}$ , we employed a 2°C h<sup>-1</sup> warming protocol, which approximates the maximum heating rate that fish experience under natural conditions (Fangue et al., 2011; Gamperl et al., 2002; Loong et al., 2005). This rate is also similar to the rate of temperature change (1 to 4°C h<sup>-1</sup>) used in other key studies investigating the role of oxygen limitations on the thermal tolerance of ectotherms (Eliason et al., 2011; Frederich and Pörtner, 2000; Giomi et al., 2014; Giomi and Pörtner, 2013; Melzner et al., 2006; Wittmann et al., 2008).

In lumpfish, the first sign of a reduced  $CT_{max}$  occurred slightly above  $P_{crit}$  at 16°C, whereas in red drum,  $CT_{max}$  was not reduced until slightly below  $P_{crit}$  at 30°C (Fig. 2C, F). Furthermore, the  $P_{CT_{max}}$  of lumpfish was closer to normoxia than the  $P_{CT_{max}}$  of red drum. Although the two species were acclimated to different temperatures, as befit the species, these data indicate that the lumpfish retained less oxygen supply capacity at  $CT_{max}$  in normoxia when compared to red drum. It has been suggested that species occupying a wide thermal range (niche) have been evolutionarily selected for a more thermally resistant cardiorespiratory system (Ern et al., 2014; Jost et al., 2012).

The differences in oxygen supply capacity at  $CT_{max}$ , observed here for lumpfish and red drum, may therefore be related to the ecology of the two species. The red drum is an athletic, free-swimming, eurythermal species inhabiting environments such as estuaries and coastal swamps that can fluctuate greatly in temperature over short temporal scales, whereas the lumpfish is a relatively sluggish, cold-water species with a more thermally stable niche (it lives in the coastal zone and in the open ocean). Despite these differences, the  $CT_{max}$  of both lumpfish and red drum decreased when  $P_wO_2$  levels fell below 80 and 47 mmHg, respectively, in accordance with the theory that survival below  $P_{crit}$  is determined by the capacity for anaerobic metabolism, and is, therefore, time-limited.

Our findings add to a series of recent studies that have suggested that upper thermal limits in a number of water-breathing ectotherms are not determined by insufficient oxygen supply capacity. These studies, performed on a range of species, have found that AS is maintained in normoxia at environmentally-relevant temperature extremes (Ern et al., 2015; Gräns et al., 2014; Norin et al., 2014), or showed that experimentally induced anaemia (internal hypoxia) had very little effect on  $CT_{max}$  (Brijs et al., 2015; Wang et al., 2014). The present study bridges these earlier studies, and confirms their findings, by showing an uncoupling of AS and  $CT_{max}$  when fish are exposed to environmental (ambient) hypoxia. Our findings are also supported by previous studies which have reported reduced  $CT_{max}$  under severe hypoxia (Weatherley, 1970; Rutledge & Beitinger, 1989; Ellis et al., 2013; Healy & Schulte, 2012) and maintained  $CT_{max}$  under moderate hypoxia (Weatherley, 1970; Ellis et al., 2013). However, direct comparisons with our results are difficult because these studies either only measured  $CT_{max}$  at one (Rutledge & Beitinger, 1989; Healy & Schulte, 2012) or two (Weatherley, 1970; Ellis et al., 2013) levels of hypoxia, applied extremely high rates of temperature increase ( $18-90^{\circ}\text{C h}^{-1}$ ) (Weatherley, 1970; Rutledge & Beitinger, 1989; Healy & Schulte, 2012), allowed  $P_wO_2$  to drift from normoxia to hypoxia during measurements (Ellis et al., 2013), or were performed on an air-breathing species with surface access (Rutledge & Beitinger, 1989).

Based on the species-specific dependence of  $CT_{max}$  on oxygen availability observed here (*i.e.*, red drum were more resilient to hypoxia than lumpfish), we propose a novel metric for classifying the oxygen-dependent thermal sensitivity of different species; the oxygen limit for thermal tolerance ( $P_{CT_{max}}$ ). By measuring  $CT_{max}$  at a range of  $P_wO_2$  levels from normoxia to below  $P_{crit}$ , an oxygen-dependent breakpoint can be established where  $CT_{max}$  is significantly affected by

hypoxia (Fig. 3A, B). Since  $P_{CT_{max}}$  defines the  $P_wO_2$  below which the upper thermal limits of water-breathing ectotherms becomes constrained, the breadth of the thermal niche under hypoxic conditions will increase with the distance between  $P_{CT_{max}}$  and the  $P_wO_2$  where AS starts to be reduced by hypoxia. If the latitudinal distribution ranges of marine fishes are shaped by their upper thermal limits (Sunday et al., 2012), then populations of species exhibiting oxygen-independent upper thermal limits at environmentally relevant  $P_wO_2$  levels should be more resilient to the occurrence of environmental hypoxia and oxygen-poor ‘dead’ zones within their thermal niche. In addition to assessing the oxygen sensitivity of upper thermal limits in water-breathing ectotherms, and the susceptibility of their upper thermal niche boundaries to environmental hypoxia, we also suggest that the  $P_{CT_{max}}$  metric can be used to assess the effects of anthropogenic pollutants and other climate change related stressors (*e.g.*, acidification and salinity changes) on the hypoxia sensitivity of upper thermal limits.

In conclusion, the  $CT_{max}$  of lumpfish and red drum was unaffected by hypoxia exposure down to  $P_wO_2$  levels of 80 and 47 mmHg, respectively, despite more than 72 and 89% reductions in AS. Thus, constrained oxygen supply capacity did not affect the  $CT_{max}$  of these species under conditions of reduced oxygen availability that are routinely encountered by many fishes in the wild. However, increases in the frequency and severity of aquatic hypoxia may cause some species to experience  $P_wO_2$  levels sufficiently low for  $CT_{max}$  to be reduced. The proposed  $P_{CT_{max}}$  metric can help identify such vulnerable species. In general, our results show that oxygen and upper thermal limits are not intimately linked, thus reinforcing the idea that there are other important physiological constraints that determine the upper thermal limits of fishes.

## Abbreviations

- $\dot{M}_{O_2}$ : Oxygen consumption rate ( $\text{mg O}_2 \text{ h}^{-1} \text{ kg}^{-1}$ )
- MMR: Maximum metabolic rate ( $\text{mg O}_2 \text{ h}^{-1} \text{ kg}^{-1}$ )
- SMR: Standard metabolic rate ( $\text{mg O}_2 \text{ h}^{-1} \text{ kg}^{-1}$ )
- RMR: Routine metabolic rate ( $\text{mg O}_2 \text{ h}^{-1} \text{ kg}^{-1}$ )
- AS: Aerobic scope ( $\text{MMR} - \text{SMR}$ ) ( $\text{mg O}_2 \text{ h}^{-1} \text{ kg}^{-1}$ )
- $CT_{max}$ : Critical thermal maximum ( $^{\circ}\text{C}$ )
- $CT_{min}$ : Critical thermal minimum ( $^{\circ}\text{C}$ )
- $T_{crit}$ : Critical temperature ( $^{\circ}\text{C}$ )
- $P_w O_2$ : Water oxygen tension (mmHg)
- $P_{crit}$ : Critical oxygen tension (mmHg)
- $P_{CT_{max}}$ : Oxygen limit for thermal tolerance (mmHg)

## **Acknowledgements**

The authors thank Dr. Keng Pee Ang (Cooke Aquaculture Inc.) and Mr. Danny Boyce (JBARB, MUN) for providing the lumpfish used in this study.

## **Competing interests**

The author declares no competing or financial interests.

## **Author's contributions**

R.E., T.N., and A.J.E. conceived the study. All authors participated in aspects of experimental design. R.E. and T.N. performed the experiments and collected the data. R.E., T.N., and A.J.E. analysed and interpreted the data. R.E. and T.N. co-wrote the initial draft, and A.J.E. and A.K.G. provided significant input with regards to revising the paper. All authors gave final approval for publication.

## **Funding**

We gratefully acknowledge financial support from the Natural Science Foundation grant to A.J.E. (EF 1315290), from the Natural Sciences and Engineering Research Council of Canada (NSERC) to A.K.G, and from the Carlsberg Foundation to R.E. through their Internationalisation Fellowship program (CF15-0321). T.N. gratefully acknowledges financial support from the Danish Council for Independent Research during the writing of this paper (Individual Post-doctoral Grant and Sapere Aude Research Talent Grant; DFF-4181-00297).

## References

- Altieri, A. H. and Gedan, K. B.** (2015). Climate change and dead zones. *Global Change Biol.* **21**, 1395-1406.
- Aquamaps.org.** (2015). <http://www.aquamaps.org>.
- Beitinger, T. L., Bennett, W. A. and McCauley, R. W.** (2000). Temperature tolerances of North American freshwater fishes exposed to dynamic changes in temperature. *Environ. Biol. Fishes.* **58**, 237-275.
- Brijs, J., Jutfelt, F., Clark, T. D., Gräns, A., Ekström, A. and Sandblom, E.** (2015). Experimental manipulations of tissue oxygen supply do not affect warming tolerance of European perch. *J. Exp. Biol.* **218**, 2448-2454.
- Claireaux, G. and Chabot, D.** (2016). Responses by fishes to environmental hypoxia: integration through Fry's concept of aerobic metabolic scope. *J. Fish Biol.* **88**, 232–251.
- Claireaux, G., Webber, D. M., Lagardere, J. P. and Kerr, S. R.** (2000). Influence of water temperature and oxygenation on the aerobic metabolic scope of Atlantic cod (*Gadus morhua*). *J. Sea. Res.* **44**, 257-265.
- Clark, T. D., Sandblom, E. and Jutfelt, F.** (2013a). Aerobic scope measurements of fishes in an era of climate change: respirometry, relevance and recommendations. *J. Exp. Biol.* **216**, 2771-2782.
- Diaz, R. J. and Rosenberg, R.** (2008). Spreading dead zones and consequences for marine ecosystems. *Science* **321**, 926-929.
- Eliason, E. J., Clark, T. D., Hague, M. J., Hanson, L. M., Gallagher, Z. S., Jeffries, K. M., Gale, M. K., Patterson, D. A., Hinch, S. G. and Farrell, A. P.** (2011). Differences in thermal tolerance among sockeye salmon populations. *Science* **332**, 109-112.
- Ellis, L. E., Sacobie, C. F. D., Kieffer, J. D. and Benfey, T. J.** (2013). The effects of dissolved oxygen and triploidy on critical thermal maximum in brook charr (*Salvelinus fontinalis*). *Comp. Biochem. Physiol. A.* **166**, 426-33.
- Ern, R., Huong, D. T. T., Phuong, N. T., Madsen, P. T., Wang, T. and Bayley, M.** (2015). Some like it hot: Thermal tolerance and oxygen supply capacity in two eurythermal crustaceans. *Sci. Rep.* **5**, 10743.
- Ern, R., Huong, D. T. T., Phuong, N. T., Wang, T. and Bayley, M.** (2014 ). Oxygen delivery does not limit thermal tolerance in a tropical eurythermal crustacean. *J. Exp. Biol.* **217**, 809-814.



- Fangue, N. A., Osborne, E. J., Todgham, A. E. and Schulte, P. M.** (2011). The onset temperature of the heat-shock response and whole-organism thermal tolerance are tightly correlated in both laboratory-acclimated and field-acclimatized tidepool sculpins (*Oligocottus maculosus*). *Physiol. Biochem. Zool.* **84**, 341-352.
- Farrell, A. P.** (2016). Pragmatic perspectives on aerobic scope: peaking, plummeting, pejus and apportioning. *J. Fish Biol.* **88**, 322-343.
- Farrell, A. P., Eliason, E. J., Sandblom, E. and Clark, T. D.** (2009). Fish cardiorespiratory physiology in an era of climate change. *Can. J. Zool.* **87**, 835-851.
- Farrell, A. P., Richards, J. G.** (2009). Defining hypoxia: An integrative synthesis of the responses of fish to hypoxia. In *Fish physiology* (eds. Farrell, A. P., Richards, J. G., Brauner, C. J.), pp. 487-503. London: Academic Press.
- Frederich, M. and Pörtner, H.-O.** (2000). Oxygen limitation of thermal tolerance defined by cardiac and ventilatory performance in spider crab, *Maja squinado*. *Am. J. Physiol. Regul. Integr. Comp. Physiol.* **279**, R1531-R1538.
- Fry, F. E. J.** (1971). The effect of environmental factors on the physiology of fish. In *Fish physiology* (eds. Hoar, W. S., Randall, D. J.), pp. 1-98. London: Academic Press.
- Gamperl, A. K., Rodnick, K. J., Faust, H. A., Venn, E. C., Bennett, M. T., Crawshaw, L. I., Keeley, E. R., Powell, M. S. and Li, H. W.** (2002). Metabolism, swimming performance, and tissue biochemistry of high desert redband trout (*Oncorhynchus mykiss* ssp.): Evidence for phenotypic differences in physiological function. *Physiol. Biochem. Zool.* **75**, 413-431.
- Giomi, F., Fusi, M., Barausse, A., Mostert, B., Pörtner, H.-O. and Cannicci, S.** (2014). Improved heat tolerance in air drives the recurrent evolution of air-breathing. *Proc. R. Soc. Lond. Ser. B. Biol. sci.* **281**.
- Giomi, F. and Pörtner, H.-O.** (2013). A role for haemolymph oxygen capacity in heat tolerance of eurythermal crabs. *Front. Physiol.* **4**, 110.
- Grans, A., Jutfelt, F., Sandblom, E., Jonsson, E., Wiklander, K., Seth, H., Olsson, C., Dupont, S., Ortega-Martinez, O., Einarsdottir, I. et al.** (2014). Aerobic scope fails to explain the detrimental effects on growth resulting from warming and elevated CO<sub>2</sub> in Atlantic halibut. *J. Exp. Biol.* **217**, 711-717.

- Healy, T. M. and Schulte, P. M.** (2012). Thermal acclimation is not necessary to maintain a wide thermal breadth of aerobic scope in the common killifish (*Fundulus heteroclitus*). *Physiol. Biochem. Zool.* **85**, 107-119.
- Johansen, J. L., Steffensen, J. F. and Jones, G. P.** (2015). Winter temperatures decrease swimming performance and limit distributions of tropical damselfishes. *Conserv. Physiol.* **3**, cov039.
- Jost, J. A., Podolski, S. M. and Frederick, M.** (2012). Enhancing thermal tolerance by eliminating the pejus range: a comparative study with three decapod crustaceans. *Mar. Ecol. Prog. Ser.* **444**, 263-274.
- Lefrancois, C. and Claireaux, G.** (2003). Influence of ambient oxygenation and temperature on metabolic scope and scope for heart rate in the common sole *Solea solea*. *Mar. Ecol. Prog. Ser.* **259**, 273-284.
- Loong, D., Butler, B., Burrows, D., Davies, A. and Faithful, J.** (2005). *Limnological assessment and benchmarking of key sentinel wetlands in the burdekin catchment, north Queensland*, Report no 05/09. Townsville, Queensland: Australian Centre for Tropical Freshwater Research, James Cook University.
- Magozzi, S. and Calosi, P.** (2015). Integrating metabolic performance, thermal tolerance, and plasticity enables for more accurate predictions on species vulnerability to acute and chronic effects of global warming. *Global Change Biol.* **21**, 181-194.
- Mark, F. C., Bock, C. and Pörtner, H.-O.** (2002). Oxygen-limited thermal tolerance in Antarctic fish investigated by MRI and P-31-MRS. *Am. J. Physiol. Regul. Integr. Comp. Physiol.* **283**, R1254-R1262.
- Melzner, F., Bock, C. and Pörtner, H.-O.** (2006). Temperature-dependent oxygen extraction from the ventilatory current and the costs of ventilation in the cephalopod *Sepia officinalis*. *J. Comp. Physiol. B* **176**, 607-621.
- Norin, T., Malte, H. and Clark, T. D.** (2014). Aerobic scope does not predict the performance of a tropical eurythermal fish at elevated temperatures. *J. Exp. Biol.* **217**, 244-251.
- Pörtner, H.-O.** (2010). Oxygen- and capacity-limitation of thermal tolerance: a matrix for integrating climate-related stressor effects in marine ecosystems. *J. Exp. Biol.* **213**, 881-893.
- Pörtner, H.-O. and Knust, R.** (2007). Climate change affects marine fishes through the oxygen limitation of thermal tolerance. *Science* **315**, 95-97.

- Pörtner, H.-O., D.M. Karl, P.W. Boyd, W.W.L. Cheung, S.E. Lluch-Cota, Y. Nojiri, D.N. Schmidt, and P.O. Zavialov** (2014b): Ocean systems. In: *Climate Change 2014: Impacts, Adaptation, and Vulnerability. Part A: Global and Sectoral Aspects. Contribution of Working Group II to the Fifth Assessment Report of the Intergovernmental Panel on Climate Change* [Field, C.B., V.R. Barros, D.J. Dokken, K.J. Mach, M.D. Mastrandrea, T.E. Bilir, M. Chatterjee, K.L. Ebi, Y.O. Estrada, R.C. Genova, B. Girma, E.S. Kissel, A.N. Levy, S. MacCracken, P.R. Mastrandrea, and L.L. White (eds.)]. Cambridge University Press, Cambridge, United Kingdom and New York, NY, USA, pp. 411-484.
- Rutledge, C. J. and Beitinger, T. L.** (1989). The effects of dissolved-oxygen and aquatic surface respiration on the critical thermal maxima of 3 intermittent-stream fishes. *Environ. Biol. Fish* **24**, 137-143.
- Somero, G. N.** (2010). The physiology of climate change: how potentials for acclimatization and genetic adaptation will determine 'winners' and 'losers'. *J. Exp. Biol.* **213**, 912-920.
- Steffensen, J. F.** (1989). Some errors in respirometry of aquatic breathers - how to avoid and correct for them. *Fish. Physiol. Biochem.* **6**, 49-59.
- Sunday, J. M., Bates, A. E. and Dulvy, N. K.** (2011). Global analysis of thermal tolerance and latitude in ectotherms. *Proc. R. Soc. B* **278**, 1823-1830.
- Sunday, J. M., Bates, A. E. and Dulvy, N. K.** (2012). Thermal tolerance and the global redistribution of animals. *Nat. Clim. Change* **2**, 686-690.
- Terblanche, J. S., Hoffmann, A. A., Mitchell, K. A., Rako, L., le Roux, P. C. and Chown, S. L.** (2011). Ecologically relevant measures of tolerance to potentially lethal temperatures. *J. Exp. Biol.* **214**, 3713-3725.
- Vinagre, C., Leal, I., Mendonça, V., Madeira, D., Narciso, L., Diniz, M. S. and Flores, A. A. V.** (2016). Vulnerability to climate warming and acclimation capacity of tropical and temperate coastal organisms. *Ecol. Indic.* **62**, 317-327.
- Wang, T., Lefevre, S., Iversen, N. K., Findorf, I., Buchanan, R. and McKenzie, D. J.** (2014). Anaemia only causes a small reduction in the upper critical temperature of sea bass: is oxygen delivery the limiting factor for tolerance of acute warming in fishes? *J. Exp. Biol.* **217**, 4275-4278.
- Weatherley, A. H.** (1970). Effects of superabundant oxygen on thermal tolerance of goldfish. *Biol. Bull.* **139**, 229.

**Wittmann, A. C., Schroer, M., Bock, C., Steeger, H. U., Paul, R. J. and Pörtner, H.-O.** (2008). Indicators of oxygen- and capacity-limited thermal tolerance in the lugworm *Arenicola marina*. *Clim. Res.* **37**, 227-240.

## Figures

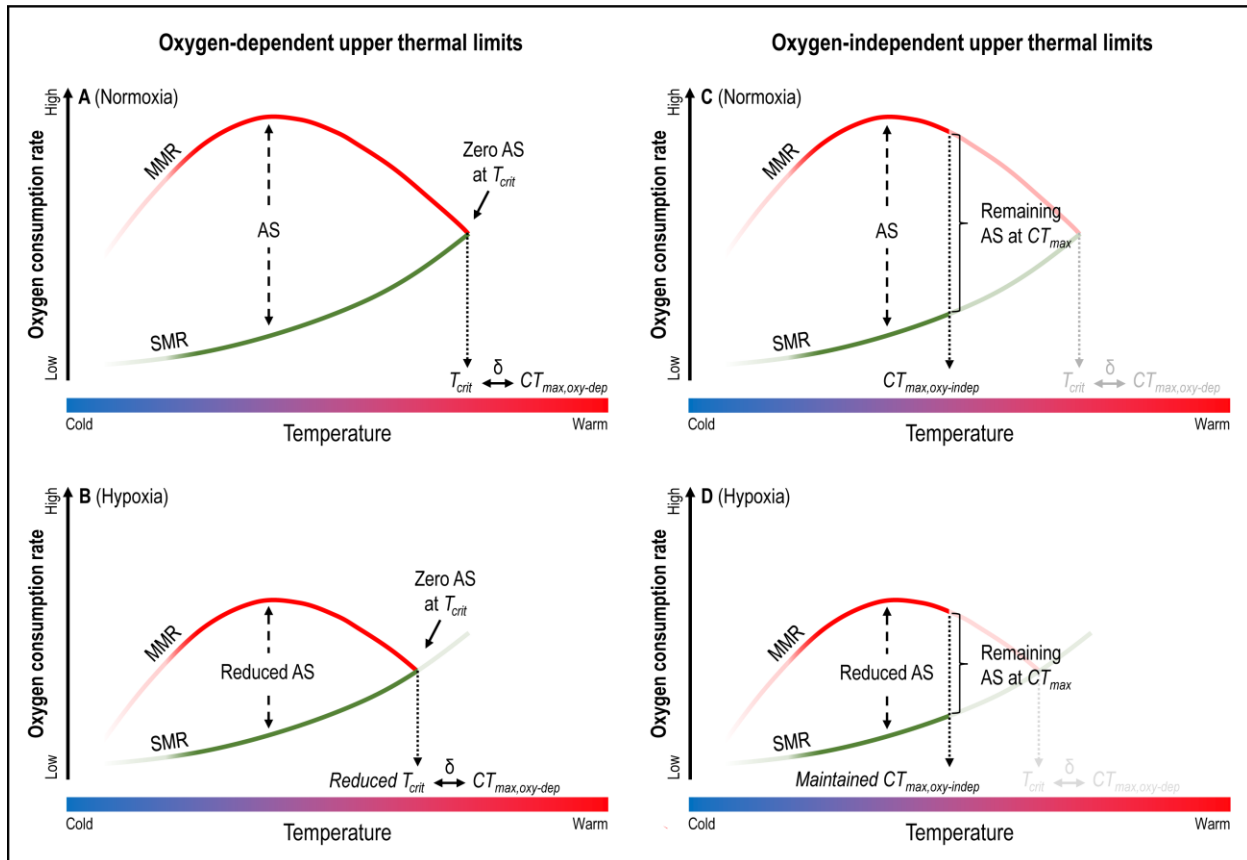

**Fig. 1. Theoretical representation of the effects of temperature and hypoxia on maximum metabolic rate (MMR), standard metabolic rate (SMR), aerobic scope (AS) (*i.e.*, MMR – SMR) and critical temperature ( $T_{crit}$ ) in (A, B) species with oxygen-dependent upper thermal limits ( $CT_{max, oxy-dep}$ ) and (C, D) species with oxygen-independent upper thermal limits ( $CT_{max, oxy-indep}$ ). In species with oxygen-dependent upper thermal limits, the exponential increase in SMR surpasses the temperature constrained MMR at  $T_{crit}$ . Above  $T_{crit}$ , aerobic SMR cannot be maintained and  $CT_{max, oxy-dep}$  defines the temperature where ATP-deficiency becomes terminal (A). Because survival above  $T_{crit}$  is determined by the capacity to support energy demands through anaerobic metabolism, the distance from  $CT_{max}$  to  $T_{crit}$  ( $\delta$ ) should decrease with increasing temperature and increase with increasing temperature rapping rate. Furthermore, any hypoxia-induced reduction in MMR will lower the temperature where MMR is surpassed by SMR,**

resulting in a reduced  $T_{crit}$  and  $CT_{max,oxy-dep}$ . Therefore,  $CT_{max,oxy-dep}$  should decline with water oxygen tension ( $P_wO_2$ ) upon exposure to any level of hypoxia sufficient to reduce MMR (B). In species with oxygen-independent upper thermal limits, the critical thermal maximum ( $CT_{max,oxy-indep}$ ) is determined by the collapse of physiological functions not directly related to oxygen supply. Consequently, MMR is not surpassed by SMR at  $CT_{max}$  and a portion of AS remains at  $CT_{max,oxy-indep}$  (C). If a hypoxia-induced reduction in MMR is not sufficient for MMR to be surpassed by SMR, then  $CT_{max,oxy-indep}$  will remain unchanged in such species (D). Thus, in species with oxygen-independent upper thermal limits,  $CT_{max,oxy-indep}$  should not decline with  $P_wO_2$  upon exposure to hypoxia above the level required to reduce AS at  $CT_{max,oxy-indep}$  in normoxia to zero.

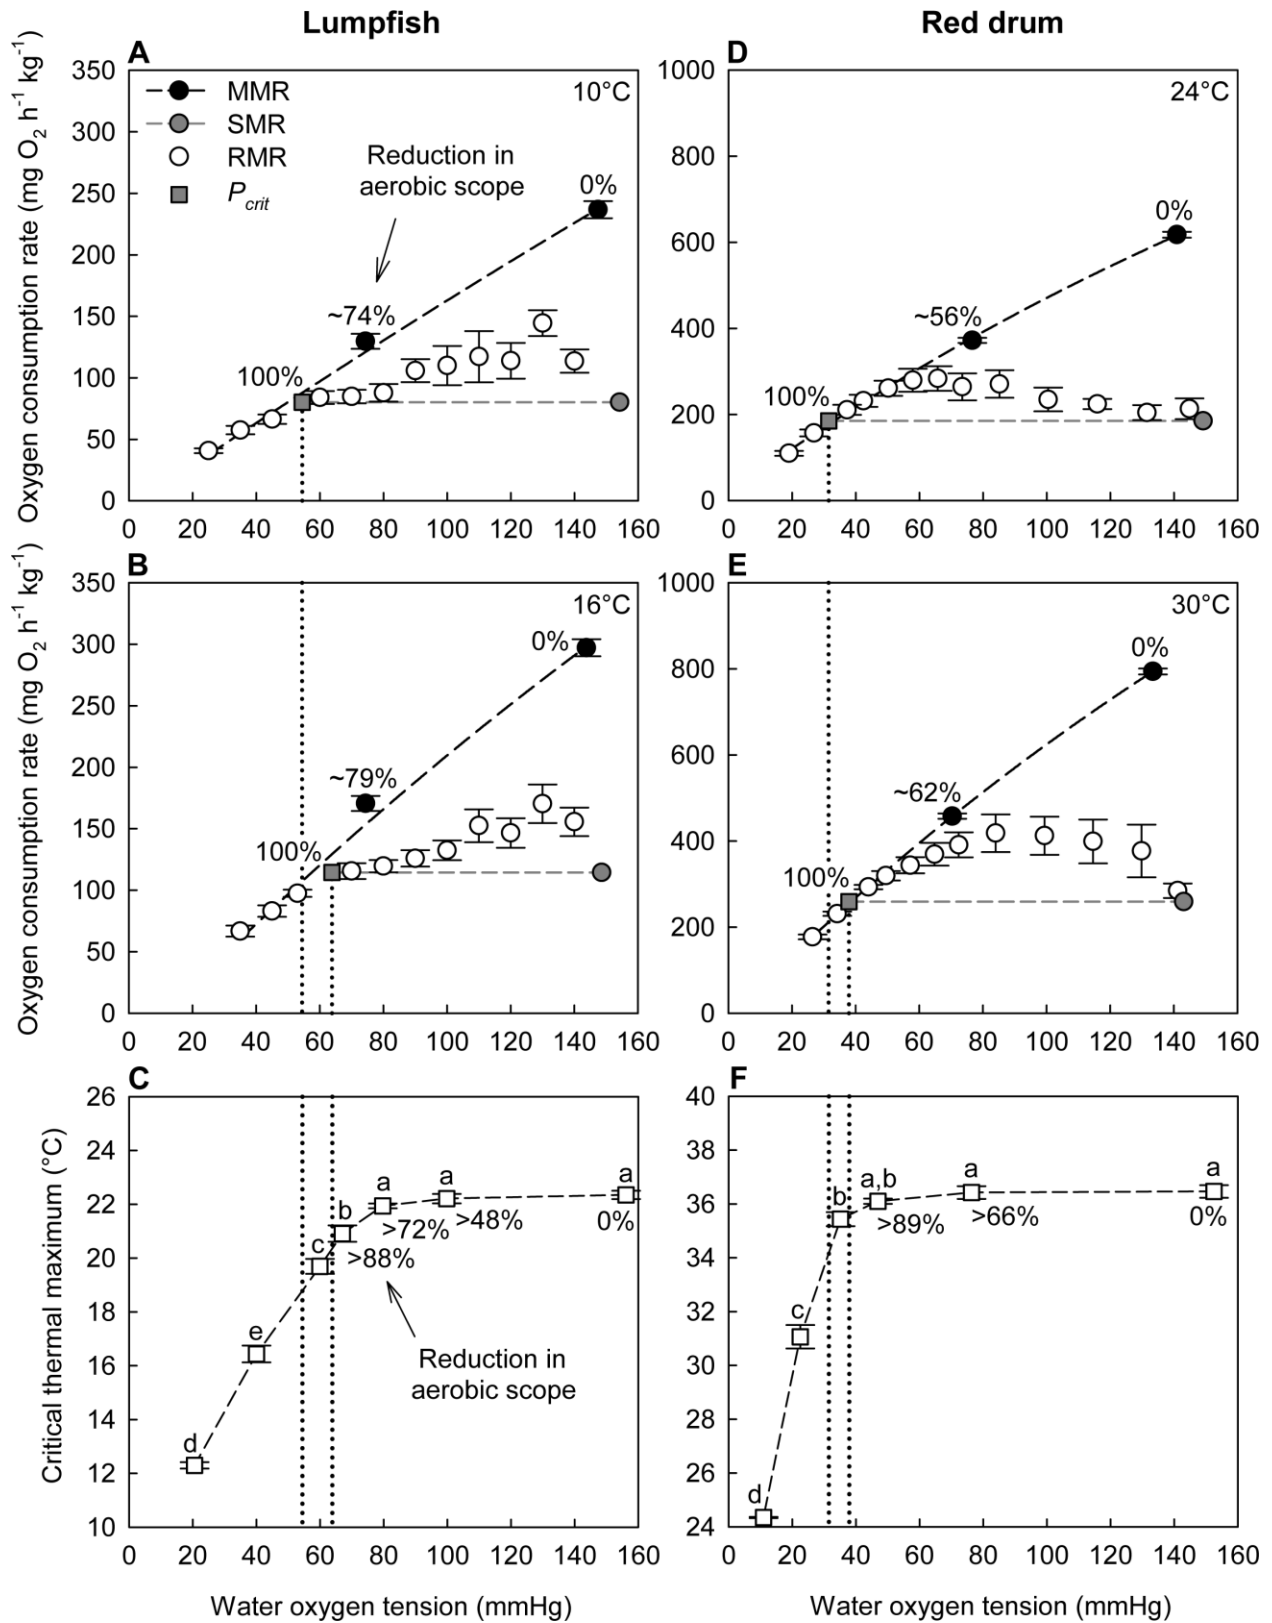

**Fig. 2. Effects of hypoxia on oxygen consumption rate ( $\dot{M}_{O_2}$ ) and critical thermal maximum ( $CT_{max}$ ) in (A, B, C) lumpfish (*Cyclopterus lumpus*) and (D, E, F) red drum (*Sciaenops ocellatus*).** Data showing the depressing effect of hypoxia (reduced water oxygen tension,  $P_wO_2$ ) on aerobic scope (AS) (maximum- minus standard metabolic rate; MMR – SMR) of lumpfish (*Cyclopterus lumpus*) (A, B) and red drum (*Sciaenops ocellatus*) (D, E) at two temperatures. Also shown is the critical oxygen tension ( $P_{crit}$ ) of the two species, which is where AS is zero. Note that, at  $P_wO_2$  levels above  $P_{crit}$ , routine metabolic rate (RMR) was greater than SMR in both species due to spontaneous activity. Despite the large reductions in AS, the  $CT_{max}$  of both species was maintained over a wide range of  $P_wO_2$  values (C, F). In lumpfish acclimated to  $10\pm 1^\circ\text{C}$ ,  $CT_{max}$  at 80 mmHg was not significantly different from  $CT_{max}$  in normoxia ( $P < 0.001$ ) despite a  $> 72\%$  reduction in AS (C). In red drum acclimated to  $22\pm 1^\circ\text{C}$ ,  $CT_{max}$  at 47 mmHg was not significantly different from  $CT_{max}$  in normoxia ( $P < 0.001$ ) despite a  $> 89\%$  reduction in AS (F). Upper thermal limits were, therefore, independent of oxygen availability over this very broad  $P_wO_2$  range. This means that the thermal sensitivity of physiological functions other than those governing oxygen supply capacity were primarily responsible for  $CT_{max}$  of both lumpfish and red drum until close to these species'  $P_{crit}$  (*i.e.*, these species follow the oxygen-independent model shown in Fig. 1C, D). Different lower-case letters indicate significant differences in  $CT_{max}$  between  $P_wO_2$  levels (one-way ANOVA,  $P < 0.05$ ). Values are means  $\pm 1$  s.e.m. ( $N = 8$  in all groups; Table 1).



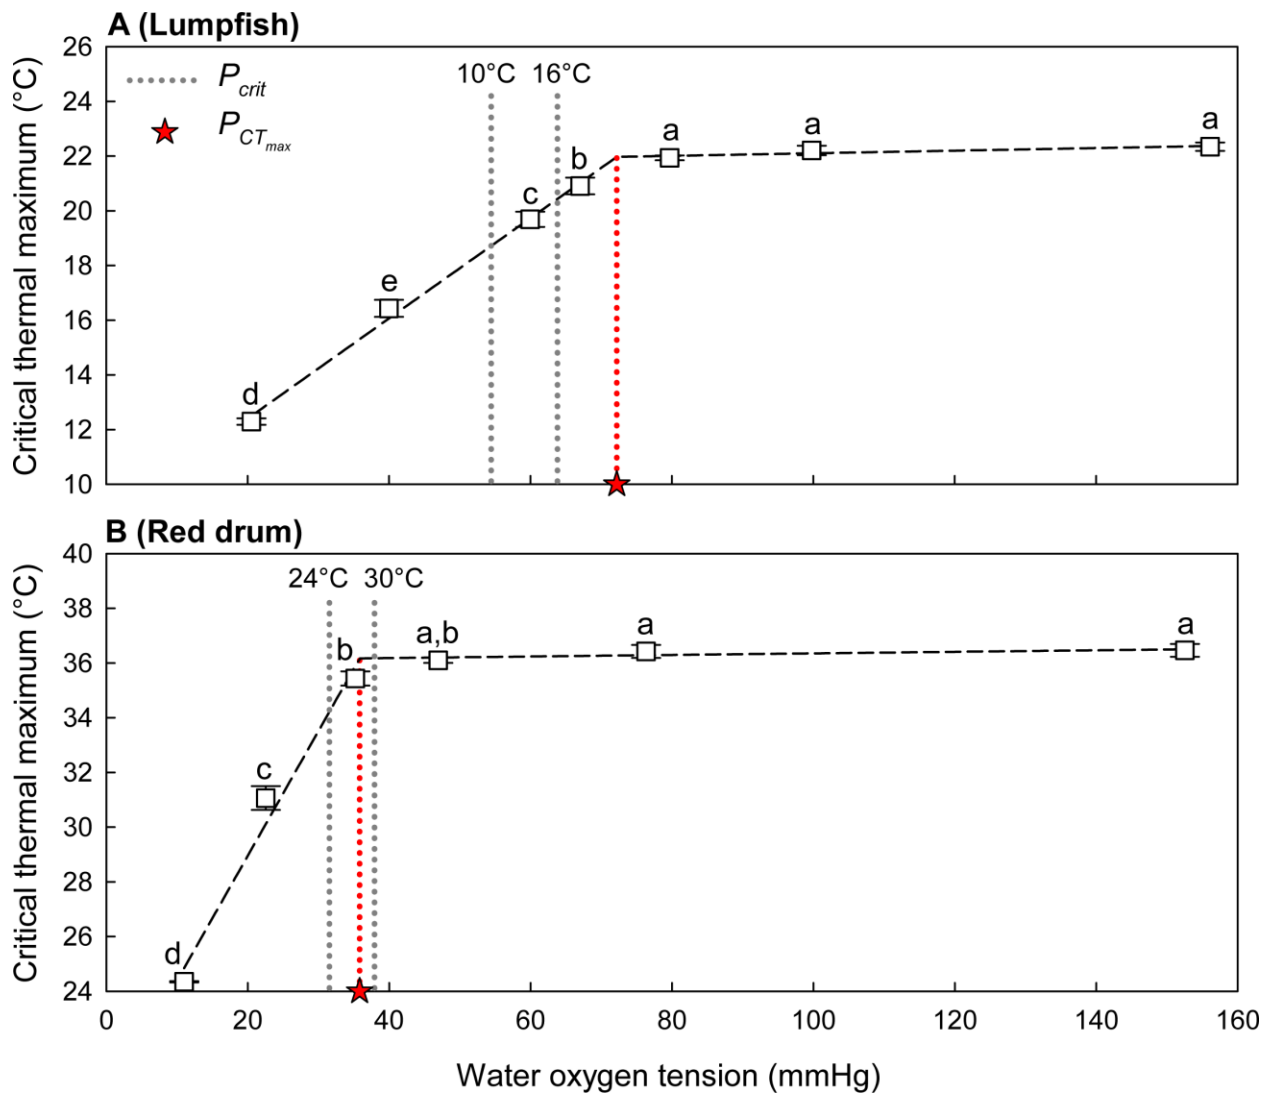

**Fig. 3.** The oxygen limit for thermal tolerance ( $P_{CT_{max}}$ ) in (A) lumpfish (*Cyclopterus lumpus*) and (B) red drum (*Sciaenops ocellatus*) acclimated to  $10\pm 1^\circ\text{C}$  and  $22\pm 1^\circ\text{C}$ , respectively.  $P_{CT_{max}}$  was determined by fitting a piecewise two-segmented linear regression through the critical thermal maximum ( $CT_{max}$ ) values that were not significantly different from  $CT_{max}$  in normoxia, and the  $CT_{max}$  values that were significantly different from  $CT_{max}$  in normoxia. In both lumpfish and red drum,  $P_{CT_{max}}$  values ( $72.2 \pm 1.8$  mmHg and  $35.8 \pm 2.4$  mmHg, respectively) lie well below the water oxygen tension ( $P_wO_2$ ) associated with large decreases in the fish's aerobic scope (Fig. 2A, B, D, E). The upper thermal limits of these two species, therefore, are oxygen-independent (as

illustrated in Fig. 1C, D) across a wide range of environmental hypoxia. Different letters indicate significant differences between  $P_wO_2$  levels (one-way ANOVA,  $P < 0.05$ ). Values are means  $\pm$  1 s.e.m. ( $N = 8$  in all groups; Table 1). The critical oxygen tensions ( $P_{crit}$ ) of lumpfish and red drum (cf. Fig. 2) are included for reference.

## Table

**Table 1.** Maximum metabolic rate (MMR), standard metabolic rate (SMR), aerobic scope (AS), critical oxygen tension ( $P_{crit}$ ), critical thermal maximum ( $CT_{max}$ ), and the oxygen limit for thermal tolerance ( $P_{CT_{max}}$ ) of lumpfish (*Cyclopterus lumpus*) and red drum (*Sciaenops ocellatus*). Included are the corresponding water temperatures ( $^{\circ}\text{C}$ ), water oxygen tensions (mmHg), and fish body masses (g). Different lower-case superscript letters indicate significant differences. Values are means  $\pm$  1 s.e.m. ( $N = 8$  in all groups). Note: there are no body masses listed for AS and  $P_{CT_{max}}$  as these parameters were calculated from the other data. Fixed experimental conditions are shown in regular font and measured parameters are presented in italics.

| <b>Lumpfish</b><br>( <i>Cyclopterus lumpus</i> )  | <b>Water</b><br><b>temperature (<math>^{\circ}\text{C}</math>)</b>           | <b>Water oxygen</b><br><b>tension (mmHg)</b> | <b>Oxygen consumption</b><br><b>rate (mg O<sub>2</sub> h<sup>-1</sup> kg<sup>-1</sup>)</b> | <b>Body</b><br><b>mass (g)</b> |                |
|---------------------------------------------------|------------------------------------------------------------------------------|----------------------------------------------|--------------------------------------------------------------------------------------------|--------------------------------|----------------|
| MMR                                               | 10 $\pm$ 0.1                                                                 | 147.4 $\pm$ 1.2                              | 236.7 $\pm$ 6.9 <sup>a</sup>                                                               | 23.0 $\pm$ 1.3                 |                |
|                                                   |                                                                              | 74.3 $\pm$ 0.5                               | 129.6 $\pm$ 6.1 <sup>b</sup>                                                               | 22.7 $\pm$ 1.1                 |                |
|                                                   | 16 $\pm$ 0.1                                                                 | 143.8 $\pm$ 1.0                              | 297.2 $\pm$ 11.4 <sup>a</sup>                                                              | 23.0 $\pm$ 1.2                 |                |
| SMR                                               | 10 $\pm$ 0.1                                                                 | 74.4 $\pm$ 0.5                               | 170.7 $\pm$ 8.6 <sup>b</sup>                                                               | 22.3 $\pm$ 1.1                 |                |
|                                                   | 16 $\pm$ 0.1                                                                 | >148                                         | 80.2 $\pm$ 3.7 <sup>a</sup>                                                                | 23.0 $\pm$ 1.5                 |                |
| AS                                                | 10 $\pm$ 0.1                                                                 | 147.4 $\pm$ 1.2                              | 156.6 $\pm$ 10.6 <sup>a</sup>                                                              | -                              |                |
|                                                   |                                                                              | 74.4 $\pm$ 0.5                               | 49.5 $\pm$ 9.8 <sup>b</sup>                                                                |                                |                |
|                                                   | 16 $\pm$ 0.1                                                                 | 143.8 $\pm$ 1.0                              | 182.9 $\pm$ 16.6 <sup>a</sup>                                                              |                                |                |
| $P_{crit}$                                        | 10 $\pm$ 0.1                                                                 | 74.4 $\pm$ 0.5                               | 56.3 $\pm$ 13.9 <sup>b</sup>                                                               |                                |                |
|                                                   | 16 $\pm$ 0.1                                                                 | 54.4 $\pm$ 5.4 <sup>a</sup>                  | -                                                                                          | 23.0 $\pm$ 1.5                 |                |
| $CT_{max}$                                        |                                                                              | 63.8 $\pm$ 5.5 <sup>b</sup>                  |                                                                                            | 22.5 $\pm$ 1.7                 |                |
|                                                   |                                                                              | 22.3 $\pm$ 0.2 <sup>a</sup>                  | 156.1 $\pm$ 2.5                                                                            | 22.7 $\pm$ 0.9                 |                |
|                                                   |                                                                              | 22.2 $\pm$ 0.2 <sup>a</sup>                  | 99.8 $\pm$ 2.5                                                                             | 21.4 $\pm$ 0.6                 |                |
|                                                   |                                                                              | 21.9 $\pm$ 0.1 <sup>a</sup>                  | 79.7 $\pm$ 2.5                                                                             | 23.2 $\pm$ 1.1                 |                |
|                                                   |                                                                              | 20.9 $\pm$ 0.3 <sup>b</sup>                  | 67.0 $\pm$ 2.5                                                                             | -                              | 22.9 $\pm$ 1.4 |
|                                                   |                                                                              | 19.7 $\pm$ 0.3 <sup>c</sup>                  | 59.9 $\pm$ 2.5                                                                             |                                | 21.6 $\pm$ 1.0 |
|                                                   |                                                                              | 16.4 $\pm$ 0.3 <sup>d</sup>                  | 40.0 $\pm$ 2.5                                                                             |                                | 23.6 $\pm$ 0.6 |
|                                                   | 12.3 $\pm$ 0.1 <sup>e</sup>                                                  | 20.5 $\pm$ 2.5                               |                                                                                            | 22.1 $\pm$ 0.8                 |                |
| $P_{CT_{max}}$                                    | -                                                                            | 72.2 $\pm$ 1.8                               | -                                                                                          | -                              |                |
| <b>Red drum</b><br>( <i>Sciaenops ocellatus</i> ) | <b>Water</b><br><b>temperature</b><br><b>(<math>^{\circ}\text{C}</math>)</b> | <b>Water oxygen</b><br><b>tension (mmHg)</b> | <b>Oxygen consumption</b><br><b>rate (mg O<sub>2</sub> h<sup>-1</sup> kg<sup>-1</sup>)</b> | <b>Body</b><br><b>mass (g)</b> |                |
| MMR                                               | 24 $\pm$ 0.1                                                                 | 140.9 $\pm$ 0.8                              | 617.8 $\pm$ 18.2 <sup>a</sup>                                                              | 46.2 $\pm$ 3.8                 |                |
|                                                   |                                                                              | 76.6 $\pm$ 1.0                               | 372.4 $\pm$ 14.6 <sup>b</sup>                                                              | 45.9 $\pm$ 3.7                 |                |
|                                                   | 30 $\pm$ 0.1                                                                 | 133.4 $\pm$ 0.6                              | 794.2 $\pm$ 43.7 <sup>a</sup>                                                              | 42.4 $\pm$ 2.4                 |                |

|                |                      |                  |                    |                |
|----------------|----------------------|------------------|--------------------|----------------|
|                |                      | $70.3 \pm 1.0$   | $458.1 \pm 14.0^b$ | $42.2 \pm 2.3$ |
| SMR            | $24 \pm 0.1$         | $>145$           | $185.1 \pm 13.2^a$ | $35.7 \pm 1.2$ |
|                | $30 \pm 0.1$         |                  | $259.1 \pm 10.3^b$ | $40.0 \pm 2.0$ |
| AS             | $24 \pm 0.1$         | $140.9 \pm 0.8$  | $432.8 \pm 31.3^a$ |                |
|                |                      | $76.6 \pm 1.0$   | $187.3 \pm 27.7^b$ | -              |
|                | $30 \pm 0.1$         | $133.4 \pm 0.6$  | $535.1 \pm 54.0^a$ |                |
|                |                      | $70.3 \pm 1.0$   | $199.0 \pm 24.3^b$ |                |
| $P_{crit}$     | $24 \pm 0.1$         | $31.5 \pm 1.7^a$ | -                  | $35.7 \pm 1.2$ |
|                | $30 \pm 0.1$         | $37.9 \pm 1.2^b$ |                    | $40.0 \pm 2.0$ |
| $CT_{max}$     | $36.5 \pm 0.2^a$     | $152.5 \pm 2.5$  |                    | $41.5 \pm 2.1$ |
|                | $36.4 \pm 0.2^a$     | $76.3 \pm 2.5$   |                    | $40.1 \pm 1.7$ |
|                | $36.1 \pm 0.1^{a,b}$ | $46.9 \pm 2.5$   |                    | $38.5 \pm 1.8$ |
|                | $35.4 \pm 0.3^b$     | $35.2 \pm 2.5$   | -                  | $44.4 \pm 3.1$ |
|                | $31.1 \pm 0.4^c$     | $22.5 \pm 2.5$   |                    | $39.1 \pm 2.3$ |
|                | $24.4 \pm 0.1^d$     | $11.0 \pm 2.5$   |                    | $42.6 \pm 3.9$ |
| $P_{CT_{max}}$ | -                    | $35.8 \pm 2.4$   | -                  | -              |
